# Supplementary material
Source: PubMed Central journal article supplement (PMC7034187)

SUPPLEMENTARY DATA

**Supplementary Table 1. Formulas for IGF1 age and sex-based percentile calculations.** Fifth-order polynomial equations were robustly fit over historical IGF1 data (31) in order to solve for Y, IGF1 percentile, using X, raw IGF1 (ng/mL). Substitute appropriate constants according to age and sex bin of subject:  $Y = B0 + B1*X + B2*X^2 + B3*X^3 + B4*X^4 + B5*X^5$ . Goodness of fit represented as robust standard deviation of the residuals (RSDR).

| Age and Sex Bin | B0     | B1      | B2        | B3        | B4        | B5         | RSDR |
|-----------------|--------|---------|-----------|-----------|-----------|------------|------|
| 0-2 y           | 13.53  | -1.894  | 7.709e-2  | -8.257e-4 | 3.705e-6  | -6.048e-9  | 0.8  |
| 2-4 y           | 24.62  | -2.249  | 6.079e-2  | -4.99e-4  | 1.76e-6   | -2.29e-9   | 0.5  |
| 4-6 y           | 24.18  | -1.754  | 3.812e-2  | -2.498e-4 | 7.028e-7  | -7.308e-10 | 0.5  |
| 6-7 y           | 39.81  | -2.254  | 3.895e-2  | -2.238e-4 | 5.625e-7  | -5.278e-10 | 0.3  |
| 7-8 y           | 55.04  | -2.383  | 3.216e-2  | -1.506e-4 | 3.088e-7  | -2.355e-10 | 0.9  |
| 8-9 y, M        | 71.02  | -2.611  | 3.004e-2  | -1.201e-4 | 2.005e-7  | -1.138e-10 | 0.9  |
| 8-9 y, F        | 48.84  | -1.706  | 1.832e-2  | -6.782e-5 | 1.105e-7  | -6.751e-11 | 0.3  |
| 9-10 y, M       | 77.01  | -2.425  | 2.363e-2  | -7.535e-5 | 8.327e-8  | -8.734e-12 | 1.1  |
| 9-10 y, F       | 69.31  | -2.014  | 1.835e-2  | -5.851e-5 | 7.92e-8   | -3.782e-11 | 1.1  |
| 10-11 y, M      | 87.57  | -2.169  | 1.476e-2  | -1.022e-5 | -1.003e-7 | 1.715e-10  | 1.0  |
| 10-11 y, F      | 71.99  | -1.762  | 1.352e-2  | -3.613e-5 | 4.027e-8  | -1.522e-11 | 1.2  |
| 11-12 y, M      | 99.58  | -2.314  | 1.587e-2  | -2.629e-5 | -2.422e-8 | 6.704e-11  | 1.1  |
| 11-12 y, F      | 55.6   | -1.186  | 7.853e-3  | -1.823e-5 | 1.866e-8  | -7.154e-12 | 0.5  |
| 12-13 y, M      | 85.85  | -1.969  | 1.424e-2  | -3.59e-5  | 3.616e-8  | -1.073e-11 | 1.1  |
| 12-13 y, F      | 56.66  | -0.952  | 4.984e-3  | -9.056e-6 | 7.167e-9  | -2.099e-12 | 0.9  |
| 13-14 y, M      | 85.12  | -1.543  | 8.808e-3  | -1.772e-5 | 1.459e-8  | -3.828e-12 | 0.9  |
| 13-14 y, F      | 89.56  | -1.095  | 4.105e-3  | -4.767e-6 | 1.28e-9   | 5.209e-13  | 1.2  |
| 14-15 y, M      | 76.95  | -1.102  | 4.969e-3  | -7.889e-6 | 5.261e-9  | -1.204e-12 | 0.9  |
| 14-15 y, F      | 100.1  | -0.9434 | 2.09e-3   | 1.872e-6  | -7.285e-9 | 4.388e-12  | 1.1  |
| 15-16 y, M      | 97.3   | -1.074  | 3.414e-3  | -2.157e-6 | -2.305e-9 | 2.202e-12  | 1.1  |
| 15-16 y, F      | 95.38  | -0.9569 | 2.497e-3  | 3.219e-7  | -5.109e-9 | 3.342e-12  | 1.0  |
| 16-17 y, M      | 95.39  | -1.009  | 2.823e-3  | 1.339e-8  | -5.562e-9 | 3.889e-12  | 1.0  |
| 16-17 y, F      | 90.46  | -0.8734 | 1.783e-3  | 3.256e-6  | -9.935e-9 | 6.012e-12  | 1.1  |
| 17-18 y, M      | 14.11  | 0.6103  | -9.78e-3  | 4.596e-5  | -8.037e-8 | 4.791e-11  | 1.1  |
| 17-18 y, F      | 21.3   | 0.5058  | -9.067e-3 | 4.326e-5  | -7.555e-8 | 4.476e-11  | 1.2  |
| 18-19 y, M      | 8.195  | 0.7015  | -1.07e-2  | 5.09e-5   | -9.116e-8 | 5.583e-11  | 1.2  |
| 18-19 y, F      | -4.779 | 1.015   | -1.349e-2 | 6.219e-5  | -1.116e-7 | 6.924e-11  | 1.1  |

SUPPLEMENTARY DATA

|         |        |        |           |           |           |            |     |
|---------|--------|--------|-----------|-----------|-----------|------------|-----|
| 19-20 y | -7.826 | 1.142  | -1.567e-2 | 7.587e-5  | -1.438e-7 | 9.451e-11  | 1.3 |
| 20-30 y | 82.48  | -2.293 | 1.99e-2   | -5.803e-5 | 6.193e-8  | -1.216e-11 | 1.3 |
| 30-40 y | 80.52  | -2.368 | 2.17e-2   | -6.648e-5 | 7.413e-8  | -1.463e-11 | 1.2 |
| 40-50 y | 75.83  | -2.359 | 2.271e-2  | -7.135e-5 | 7.746e-8  | -7.634e-12 | 1.1 |
| 50-60 y | 80.33  | -2.68  | 2.804e-2  | -1.012e-4 | 1.451e-7  | -6.067e-11 | 1.1 |
| 60-70 y | 73.41  | -2.663 | 3.031e-2  | -1.205e-4 | 2.002e-7  | -1.132e-10 | 0.9 |

SUPPLEMENTARY DATA

**Supplementary Table 2. Formulas for IGF2 age-based percentile calculations.** Semilog lines were fit over historical IGF2 data (31) in order to solve for Y, IGF2 percentile, using X, raw IGF2 (ng/mL). Substitute appropriate constants according to age bin of subject:  $Y = Y\text{-intercept} + \text{Slope} \cdot \log(X)$ . Goodness of fit represented as absolute sum of squares.

| Age Bin | Slope | Y-intercept | Absolute Sum of Squares |
|---------|-------|-------------|-------------------------|
| 1-3 y   | 235.4 | -603.4      | 1.9e-3                  |
| 3-5 y   | 246.4 | -636        | 3.3                     |
| 5-7 y   | 246   | -640        | 4.7e-3                  |
| 7-9 y   | 248.5 | -650        | 1.9e-2                  |
| 9-11 y  | 255.7 | -671.4      | 1.3e-2                  |
| 11-13 y | 256.2 | -674.2      | 2.0e-3                  |
| 13-15 y | 258.6 | -682.4      | 1.1e-3                  |
| 15-20 y | 248.1 | -653.8      | 1.3e-3                  |
| 20-30 y | 233.8 | -612        | 4.9e-4                  |
| 30-40 y | 239.8 | -629.3      | 1.3e-2                  |
| 40-50 y | 221.1 | -572        | 1.2e-3                  |
| 50-60 y | 212.7 | -547.6      | 3.7e-3                  |
| 60-70 y | 210.1 | -535.4      | 1.0e-3                  |

SUPPLEMENTARY DATA

**Supplementary Table 3. Multiplicity adjusted p-values for Figure 1.**

| Figure                       | Dunn's multiple comparisons test | Mean rank diff. | Significant? | Adjusted p-value |
|------------------------------|----------------------------------|-----------------|--------------|------------------|
| 1C                           | AAb- Control vs. AAb- Relative   | -5.804          | ns           | >0.9999          |
|                              | AAb- Control vs. AAb+            | 84.67           | ****         | <0.0001          |
|                              | AAb- Control vs. Recent Onset    | 19.77           | ns           | >0.9999          |
|                              | AAb- Control vs. Established     | 23.58           | ns           | >0.9999          |
|                              | AAb- Relative vs. AAb+           | 90.48           | ****         | <0.0001          |
|                              | AAb- Relative vs. Recent Onset   | 25.57           | ns           | >0.9999          |
|                              | AAb- Relative vs. Established    | 29.39           | ns           | 0.6349           |
|                              | AAb+ vs. Recent Onset            | -64.91          | **           | 0.0010           |
|                              | AAb+ vs. Established             | -61.09          | **           | 0.0019           |
| Recent Onset vs. Established | 3.818                            | ns              | >0.9999      |                  |
| 1D                           | AAb- Control vs. AAb- Relative   | -61.75          | **           | 0.0010           |
|                              | AAb- Control vs. AAb+            | 24.54           | ns           | >0.9999          |
|                              | AAb- Control vs. Recent Onset    | -0.8724         | ns           | >0.9999          |
|                              | AAb- Control vs. Established     | -50.33          | **           | 0.0082           |
|                              | AAb- Relative vs. AAb+           | 86.28           | ****         | <0.0001          |
|                              | AAb- Relative vs. Recent Onset   | 60.88           | **           | 0.0020           |
|                              | AAb- Relative vs. Established    | 11.41           | ns           | >0.9999          |
|                              | AAb+ vs. Recent Onset            | -25.41          | ns           | >0.9999          |

SUPPLEMENTARY DATA

|    |                                |        |      |         |
|----|--------------------------------|--------|------|---------|
|    | AAb+ vs. Established           | -74.87 | **** | <0.0001 |
|    | Recent Onset vs. Established   | -49.46 | *    | 0.0145  |
| 1E | AAb- Relative vs. 1 AAb+       | 50.03  | ***  | 0.0002  |
|    | AAb- Relative vs. 2-3 AAb+     | 48.09  | ***  | 0.0001  |
|    | AAb- Relative vs. Recent Onset | 13.32  | ns   | 0.8028  |
|    | 1 AAb+ vs. 2-3 AAb+            | -1.939 | ns   | >0.9999 |
|    | 1 AAb+ vs. Recent Onset        | -36.72 | *    | 0.0120  |
|    | 2-3 AAb+ vs. Recent Onset      | -34.78 | **   | 0.0098  |
| 1F | AAb- Relative vs. 1 AAb+       | 36.87  | **   | 0.0099  |
|    | AAb- Relative vs. 2-3 AAb+     | 55.53  | **** | <0.0001 |
|    | AAb- Relative vs. Recent Onset | 31.94  | **   | 0.0024  |
|    | 1 AAb+ vs. 2-3 AAb+            | 18.66  | ns   | 0.9982  |
|    | 1 AAb+ vs. Recent Onset        | -4.926 | ns   | >0.9999 |
|    | 2-3 AAb+ vs. Recent Onset      | -23.58 | ns   | 0.2141  |

SUPPLEMENTARY DATA

**Supplementary Table 4. Multiplicity adjusted p-values for Supplementary Figure 1.**

| Figure | Dunn's multiple comparisons test | Mean rank diff. | Significant? | Adjusted p-value |
|--------|----------------------------------|-----------------|--------------|------------------|
| S1A    | AAb- Control vs. AAb- Relative   | 7.020           | ns           | >0.9999          |
|        | AAb- Control vs. AAb+            | 76.81           | ****         | <0.0001          |
|        | AAb- Control vs. Recent Onset    | 28.27           | ns           | 0.6455           |
|        | AAb- Control vs. Established     | 40.00           | ns           | 0.0737           |
|        | AAb- Relative vs. AAb+           | 69.79           | ***          | 0.0004           |
|        | AAb- Relative vs. Recent Onset   | 21.25           | ns           | >0.9999          |
|        | AAb- Relative vs. Established    | 32.98           | ns           | 0.3728           |
|        | AAb+ vs. Recent Onset            | -48.54          | *            | 0.0365           |
|        | AAb+ vs. Established             | -36.81          | ns           | 0.2447           |
|        | Recent Onset vs. Established     | 11.73           | ns           | >0.9999          |
| S1B    | AAb- Control vs. AAb- Relative   | -62.82          | ***          | 0.0008           |
|        | AAb- Control vs. AAb+            | 25.00           | ns           | >0.9999          |
|        | AAb- Control vs. Recent Onset    | 0.1076          | ns           | >0.9999          |
|        | AAb- Control vs. Established     | -47.77          | *            | 0.0152           |
|        | AAb- Relative vs. AAb+           | 87.82           | ****         | <0.0001          |
|        | AAb- Relative vs. Recent Onset   | 62.93           | **           | 0.0012           |
|        | AAb- Relative vs. Established    | 15.05           | ns           | >0.9999          |
|        | AAb+ vs. Recent Onset            | -24.89          | ns           | >0.9999          |

SUPPLEMENTARY DATA

|     |                              |        |      |         |
|-----|------------------------------|--------|------|---------|
|     | AAb+ vs. Established         | -72.77 | **** | <0.0001 |
|     | Recent Onset vs. Established | -47.88 | *    | 0.0208  |
| S1C | AAb- vs. 1 AAb+              | 49.88  | ***  | 0.0002  |
|     | AAb- vs. 2-3 AAb+            | 29.69  | *    | 0.0491  |
|     | AAb- vs. Recent Onset        | 11.71  | ns   | >0.9999 |
|     | 1 AAb+ vs. 2-3 AAb+          | -20.19 | ns   | 0.8467  |
|     | 1 AAb+ vs. Recent Onset      | -38.18 | **   | 0.0079  |
|     | 2-3 AAb+ vs. Recent Onset    | -17.98 | ns   | 0.6206  |
| S1D | AAb- vs. 1 AAb+              | 40.22  | **   | 0.0036  |
|     | AAb- vs. 2-3 AAb+            | 54.18  | **** | <0.0001 |
|     | AAb- vs. Recent Onset        | 33.02  | **   | 0.0016  |
|     | 1 AAb+ vs. 2-3 AAb+          | 13.96  | ns   | >0.9999 |
|     | 1 AAb+ vs. Recent Onset      | -7.204 | ns   | >0.9999 |
|     | 2-3 AAb+ vs. Recent Onset    | -21.16 | ns   | 0.3588  |

SUPPLEMENTARY DATA

**Supplementary Table 5. Percentages of IGF1 and IGF2 measurements compared to reference ranges for age and sex, per group.** Subjects from UF cross-sectional cohort. IGF1 and IGF2 levels were below the fifth percentile in a higher percentage of 1 AAb+ and 2-3 AAb+ subjects as compared to all other groups.

| <b>Characteristic</b> | <b>IGF1</b>                              |                            | <b>IGF2</b>                              |                            |
|-----------------------|------------------------------------------|----------------------------|------------------------------------------|----------------------------|
|                       | <b>n below 5<sup>th</sup> percentile</b> | <b>% of total subjects</b> | <b>n below 5<sup>th</sup> percentile</b> | <b>% of total subjects</b> |
| <i>AAb- Control</i>   | 2                                        | 2.90%                      | 6                                        | 8.70%                      |
| <i>AAb- Relative</i>  | 6                                        | 10.91%                     | 0                                        | 0.00%                      |
| <i>1 AAb+</i>         | 8                                        | 36.36%                     | 3                                        | 12.00%                     |
| <i>2-3 AAb+</i>       | 9                                        | 33.33%                     | 7                                        | 25.93%                     |
| <i>Recent Onset</i>   | 5                                        | 8.20%                      | 1                                        | 1.64%                      |
| <i>Established</i>    | 7                                        | 10.45%                     | 2                                        | 2.94%                      |



SUPPLEMENTARY DATA

**Supplementary Table 6. Multiplicity adjusted p-values for Supplementary Figure 2.**

| Figure | Dunn's multiple comparisons test | Mean rank diff. | Significant? | Adjusted p-value |
|--------|----------------------------------|-----------------|--------------|------------------|
| S2A    | AAb- Control vs. AAb- Relative   | -8.621          | ns           | >0.9999          |
|        | AAb- Control vs. AAb+            | -48.82          | *            | 0.0205           |
|        | AAb- Control vs. Recent Onset    | -18.47          | ns           | >0.9999          |
|        | AAb- Control vs. Established     | -50.99          | **           | 0.0052           |
|        | AAb- Relative vs. AAb+           | -40.20          | ns           | 0.1459           |
|        | AAb- Relative vs. Recent Onset   | -9.848          | ns           | >0.9999          |
|        | AAb- Relative vs. Established    | -42.37          | ns           | 0.0579           |
|        | AAb+ vs. Recent Onset            | 30.36           | ns           | 0.6289           |
|        | AAb+ vs. Established             | -2.167          | ns           | >0.9999          |
|        | Recent Onset vs. Established     | -32.52          | ns           | 0.3245           |
| S2B    | AAb- Control vs. AAb- Relative   | -18.06          | ns           | >0.9999          |
|        | AAb- Control vs. AAb+            | 10.40           | ns           | >0.9999          |
|        | AAb- Control vs. Recent Onset    | 19.84           | ns           | >0.9999          |
|        | AAb- Control vs. Established     | 0.1971          | ns           | >0.9999          |
|        | AAb- Relative vs. AAb+           | 28.46           | ns           | 0.8714           |
|        | AAb- Relative vs. Recent Onset   | 37.90           | ns           | 0.1914           |
|        | AAb- Relative vs. Established    | 18.26           | ns           | >0.9999          |
|        | AAb+ vs. Recent Onset            | 9.437           | ns           | >0.9999          |

SUPPLEMENTARY DATA

|                      |                                |        |        |         |
|----------------------|--------------------------------|--------|--------|---------|
|                      | AAb+ vs. Established           | -10.20 | ns     | >0.9999 |
|                      | Recent Onset vs. Established   | -19.64 | ns     | >0.9999 |
| S2C                  | AAb- Control vs. AAb- Relative | 18.71  | ns     | >0.9999 |
|                      | AAb- Control vs. AAb+          | 22.21  | ns     | >0.9999 |
|                      | AAb- Control vs. Recent Onset  | 45.92  | *      | 0.0311  |
|                      | AAb- Control vs. Established   | 32.42  | ns     | 0.2901  |
|                      | AAb- Relative vs. AAb+         | 3.499  | ns     | >0.9999 |
|                      | AAb- Relative vs. Recent Onset | 27.21  | ns     | 0.9262  |
|                      | AAb- Relative vs. Established  | 13.71  | ns     | >0.9999 |
|                      | AAb+ vs. Recent Onset          | 23.71  | ns     | >0.9999 |
|                      | AAb+ vs. Established           | 10.21  | ns     | >0.9999 |
|                      | Recent Onset vs. Established   | -13.50 | ns     | >0.9999 |
| S2D                  | AAb- Control vs. AAb- Relative | -20.97 | ns     | >0.9999 |
|                      | AAb- Control vs. AAb+          | 27.17  | ns     | 0.8976  |
|                      | AAb- Control vs. Recent Onset  | 33.23  | ns     | 0.3237  |
|                      | AAb- Control vs. Established   | -6.997 | ns     | >0.9999 |
|                      | AAb- Relative vs. AAb+         | 48.13  | *      | 0.0382  |
|                      | AAb- Relative vs. Recent Onset | 54.20  | **     | 0.0081  |
|                      | AAb- Relative vs. Established  | 13.97  | ns     | >0.9999 |
|                      | AAb+ vs. Recent Onset          | 6.070  | ns     | >0.9999 |
| AAb+ vs. Established | -34.16                         | ns     | 0.3119 |         |

SUPPLEMENTARY DATA

|     |                              |        |    |         |
|-----|------------------------------|--------|----|---------|
|     | Recent Onset vs. Established | -40.23 | ns | 0.0886  |
| S2E | AAb- vs. 1 AAb+              | -28.18 | ns | 0.0808  |
|     | AAb- vs. 2-3 AAb+            | -16.70 | ns | 0.7643  |
|     | AAb- vs. Recent Onset        | -5.574 | ns | >0.9999 |
|     | 1 AAb+ vs. 2-3 AAb+          | 11.48  | ns | >0.9999 |
|     | 1 AAb+ vs. Recent Onset      | 22.60  | ns | 0.2776  |
|     | 2-3 AAb+ vs. Recent Onset    | 11.12  | ns | >0.9999 |
| S2F | AAb- vs. 1 AAb+              | 11.60  | ns | >0.9999 |
|     | AAb- vs. 2-3 AAb+            | 17.35  | ns | 0.7057  |
|     | AAb- vs. Recent Onset        | 20.79  | ns | 0.1185  |
|     | 1 AAb+ vs. 2-3 AAb+          | 5.750  | ns | >0.9999 |
|     | 1 AAb+ vs. Recent Onset      | 9.189  | ns | >0.9999 |
|     | 2-3 AAb+ vs. Recent Onset    | 3.439  | ns | >0.9999 |
| S2G | AAb- vs. 1 AAb+              | 8.928  | ns | >0.9999 |
|     | AAb- vs. 2-3 AAb+            | -3.700 | ns | >0.9999 |
|     | AAb- vs. Recent Onset        | 14.53  | ns | 0.6205  |
|     | 1 AAb+ vs. 2-3 AAb+          | -12.63 | ns | >0.9999 |
|     | 1 AAb+ vs. Recent Onset      | 5.600  | ns | >0.9999 |
|     | 2-3 AAb+ vs. Recent Onset    | 18.23  | ns | 0.5900  |
| S2H | AAb- vs. 1 AAb+              | 22.70  | ns | 0.2955  |
|     | AAb- vs. 2-3 AAb+            | 32.86  | *  | 0.0183  |

SUPPLEMENTARY DATA

|  |                           |        |    |         |
|--|---------------------------|--------|----|---------|
|  | AAb- vs. Recent Onset     | 30.51  | ** | 0.0038  |
|  | 1 AAb+ vs. 2-3 AAb+       | 10.16  | ns | >0.9999 |
|  | 1 AAb+ vs. Recent Onset   | 7.803  | ns | >0.9999 |
|  | 2-3 AAb+ vs. Recent Onset | -2.355 | ns | >0.9999 |

SUPPLEMENTARY DATA

**Supplementary Table 7. Circulating IGFs can discriminate type 1 diabetes stages without the need for IGFBP measurements.** A multinomial logistic regression model was established using R version 3.4.1. Only individuals with complete IGF1, IGF2, and IGFBP data, as well as reported race/ethnicity were included in the analysis. As height and weight information were voluntarily provided, missing BMI percentile data were imputed with predictive means matching using the MICE package. An automated forward variable selection method from the LEAPS package was used to generate a multinomial logistic regression model evaluating age, BMI percentile, sex, ethnicity, and log-transformed IGF1, IGF2, IGFBP1, IGFBP3, IGFBP6, and IGFBP7 concentrations as explanatory variables for a model to predict the cohort of the subject as the response variable. The variables included in the best additive model are shown here. The relevance of each explanatory variable in modeling differences between groups was determined by calculating relative risk ratios (RRR) with 95% CI, with the logically previous group in progression to disease as the referent.

| Characteristic    | AAb- Relatives vs. 1 AAb+ |          | 1 AAb+ vs. 2-3 AAb+ |         | 2-3 AAb+ vs. Recent Onset |         |
|-------------------|---------------------------|----------|---------------------|---------|---------------------------|---------|
|                   | RRR (95% CI)              | p value  | RRR (95% CI)        | p value | RRR (95% CI)              | p value |
| <i>Log.IGF1</i>   | 0.06 (0.02 - 0.20)        | < 0.0001 | 1.81 (0.61 - 5.36)  | 0.28    | 4.32 (1.58 - 11.85)       | < 0.01  |
| <i>Log.IGF2</i>   | 0.17 (0.04 - 0.67)        | < 0.05   | 0.61 (0.14 - 2.76)  | 0.52    | 2.52 (0.62 - 10.19)       | 0.19    |
| <i>Age</i>        | 1.17 (0.98 - 1.41)        | 0.09     | 1.08 (0.90 - 1.30)  | 0.39    | 0.83 (0.71 - 0.96)        | < 0.05  |
| <i>Log.IGFBP7</i> | 0.16 (0.02 - 1.34)        | 0.09     | 0.78 (0.09 - 6.57)  | 0.82    | 1.02 (0.18 - 5.67)        | 0.98    |

SUPPLEMENTARY DATA

**Supplementary Figure 1. Raw total IGF1 and IGF2 levels are significantly decreased in serum of AAb+ subjects at high risk for type 1 diabetes onset.** Subjects from UF cross-sectional cohort. Violin plots showing (A) raw IGF1 levels show decreased IGF1 in AAb+ subjects as compared to AAb-controls, AAb- relatives, and subjects with recent-onset type 1 diabetes. (B) Raw IGF2 levels are decreased in AAb+ subjects and subjects with recent-onset disease as compared to AAb- relatives and established type 1 diabetes. Upon stratification of AAb+ group by number of AAb, (C) raw IGF1 levels and (D) raw IGF2 levels remain significantly decreased for those with any number of AAb. Kruskal-Wallis with Dunn's multiple comparisons test: \*,  $p < 0.05$ ; \*\*,  $p < 0.01$ ; \*\*\*,  $p < 0.001$ ; \*\*\*\*,  $p < 0.0001$ .

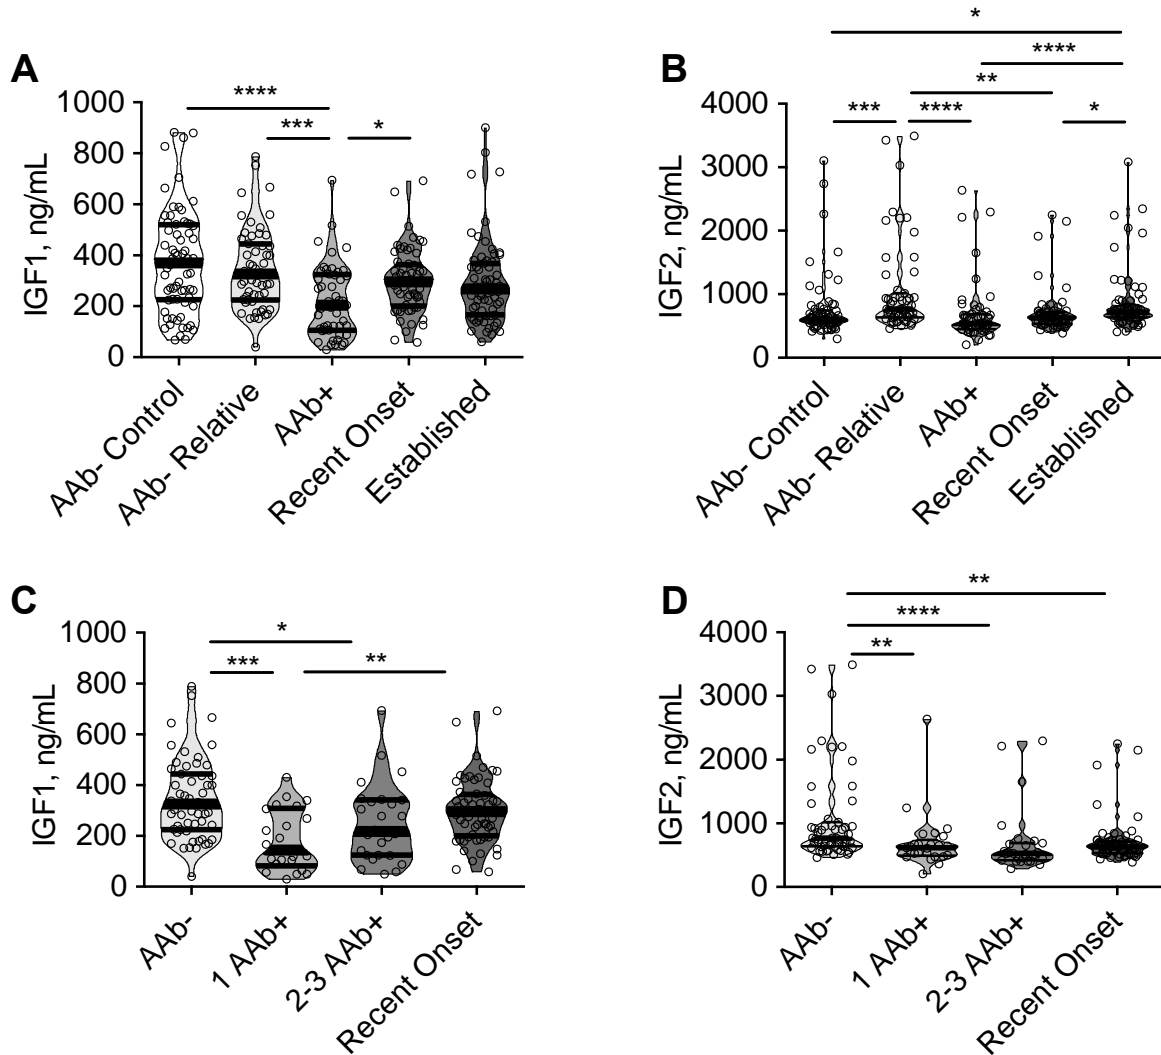

## SUPPLEMENTARY DATA

**Supplementary Figure 2. High-affinity IGFBP levels are generally unchanged in serum of AAb+ subjects and subjects with recent-onset type 1 diabetes.** Subjects from UF cross-sectional cohort. Violin plots showing (A) IGFBP1 increased in AAb+ subjects as compared to AAb- controls. (B) IGFBP3 appears relatively stable during disease pathogenesis. (C) IGFBP6 decreased in subjects with recent-onset disease as compared to AAb- controls. (D) IGFBP7 decreased in subjects with recent-onset type 1 diabetes and AAb+ subjects as compared to AAb- relatives. Upon stratification of AAb+ group by number of AAb, (E) IGFBP1, (F) IGFBP3 and (G) IGFBP6 levels did not significantly change between at-risk groups. (H) IGFBP7 decreased in subjects with multiple AAb+ as compared to AAb- relatives. Kruskal-Wallis with Dunn's multiple comparisons test: \*,  $p < 0.05$ ; \*\*,  $p < 0.01$ .

SUPPLEMENTARY DATA

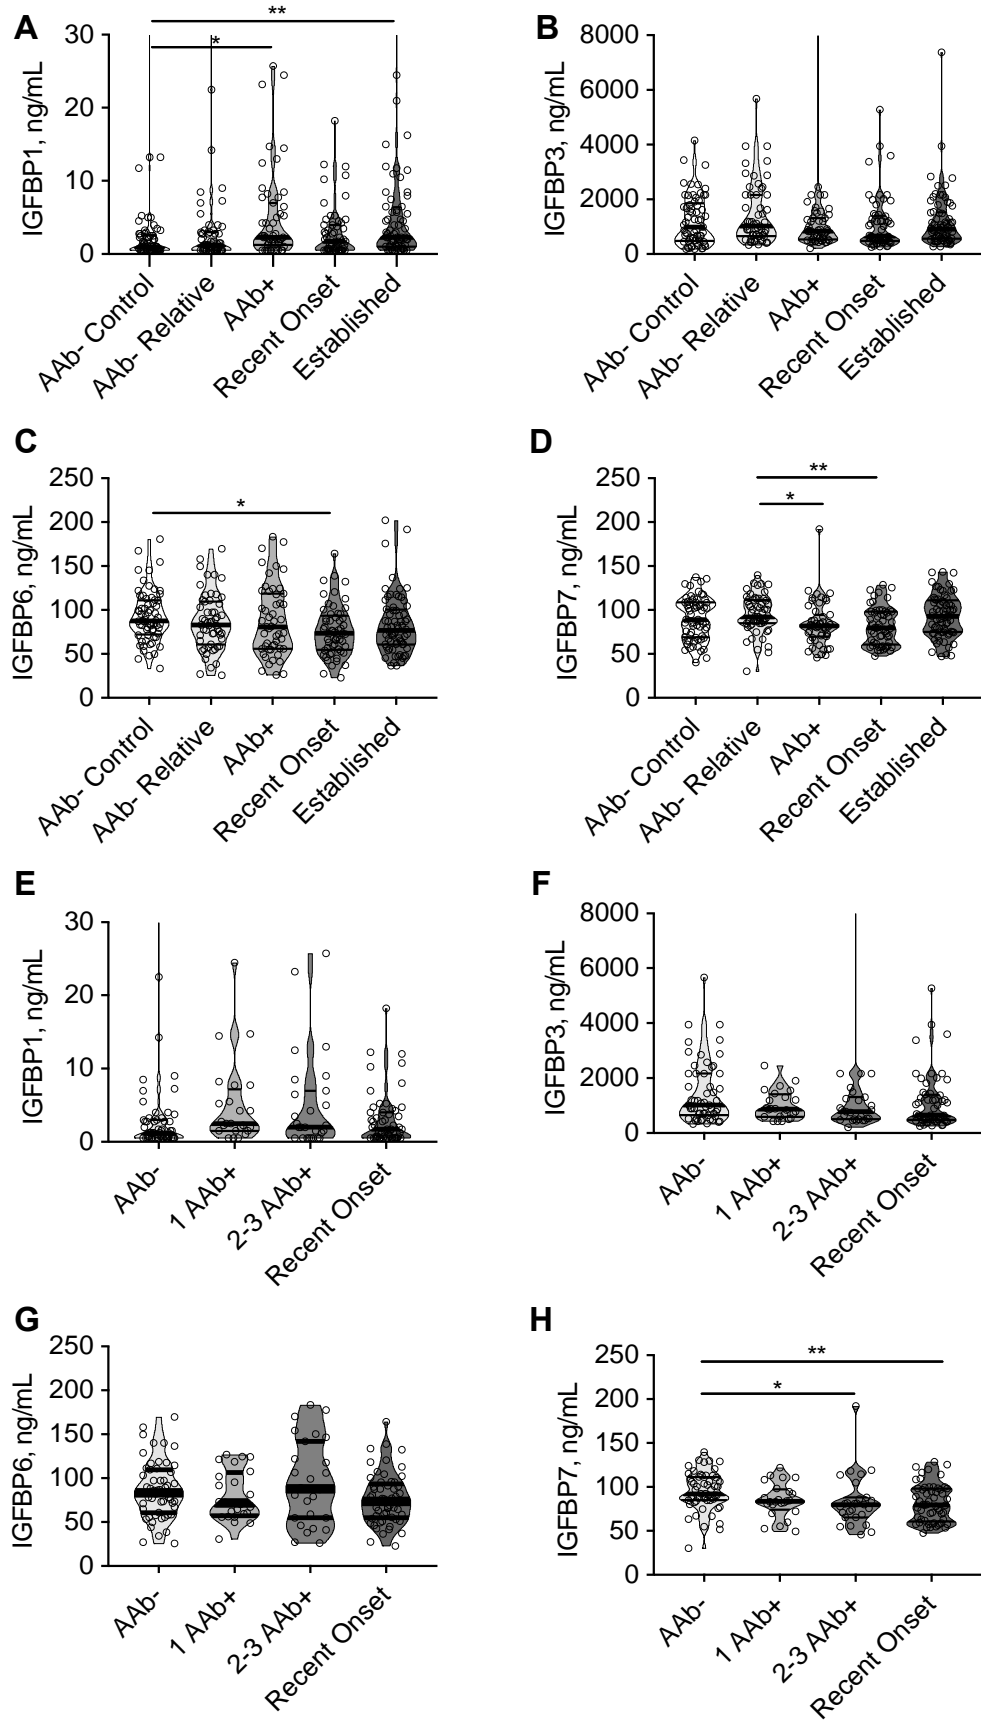



SUPPLEMENTARY DATA

**Supplementary Figure 3. IGF1 levels show trends for association with endogenous  $\beta$ -cell function.**

In previously fasted subjects with type 1 diabetes from BRI, (A) IGF1 percentile shows a trend for a positive correlation with C-peptide AUC and does not associate with (B) HbA1c or (C) fasting blood glucose levels. (D) C-peptide AUC is significantly and negatively correlated with disease duration in this cohort. Data are overlaid with best fit lines (solid) and 95% CI (dashed lines). Spearman correlation.

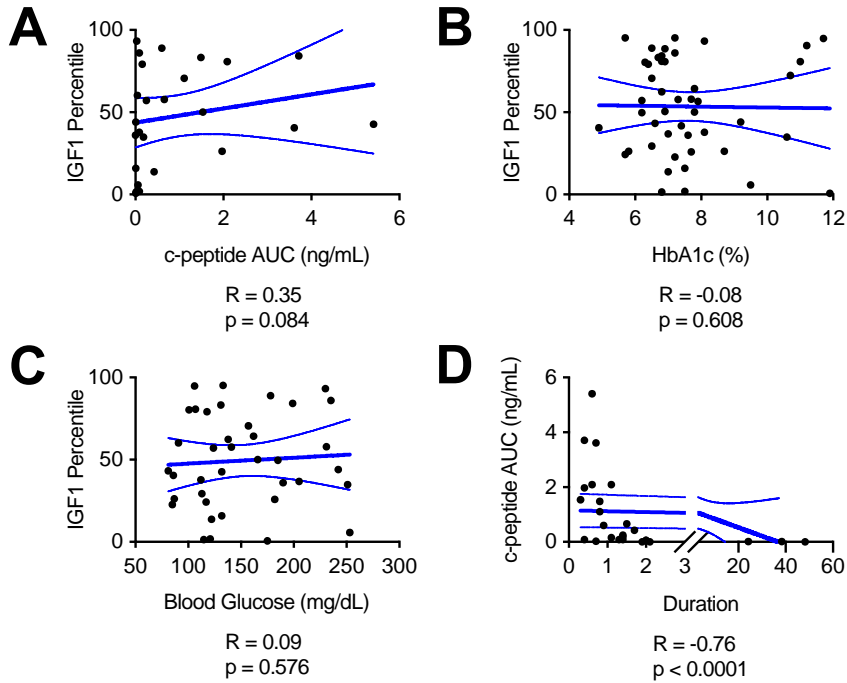

SUPPLEMENTARY DATA

**Supplementary Figure 4. Longitudinal follow-up of subjects with a single AAb at enrollment shows IGF1 stability over time.** Subjects from longitudinal T1DBIT cohort. Raw IGF1 levels of individual T1DBIT subjects shown as solid lines. Subjects arranged in order of increasing age. 5%, 50%, and 95% reference ranges for age and sex are shown per person as horizontal dashed lines. Time of pre-type 1 diabetes ( $a1c > 5.7$ ) or seroconversion events shown with vertical dashed black lines.

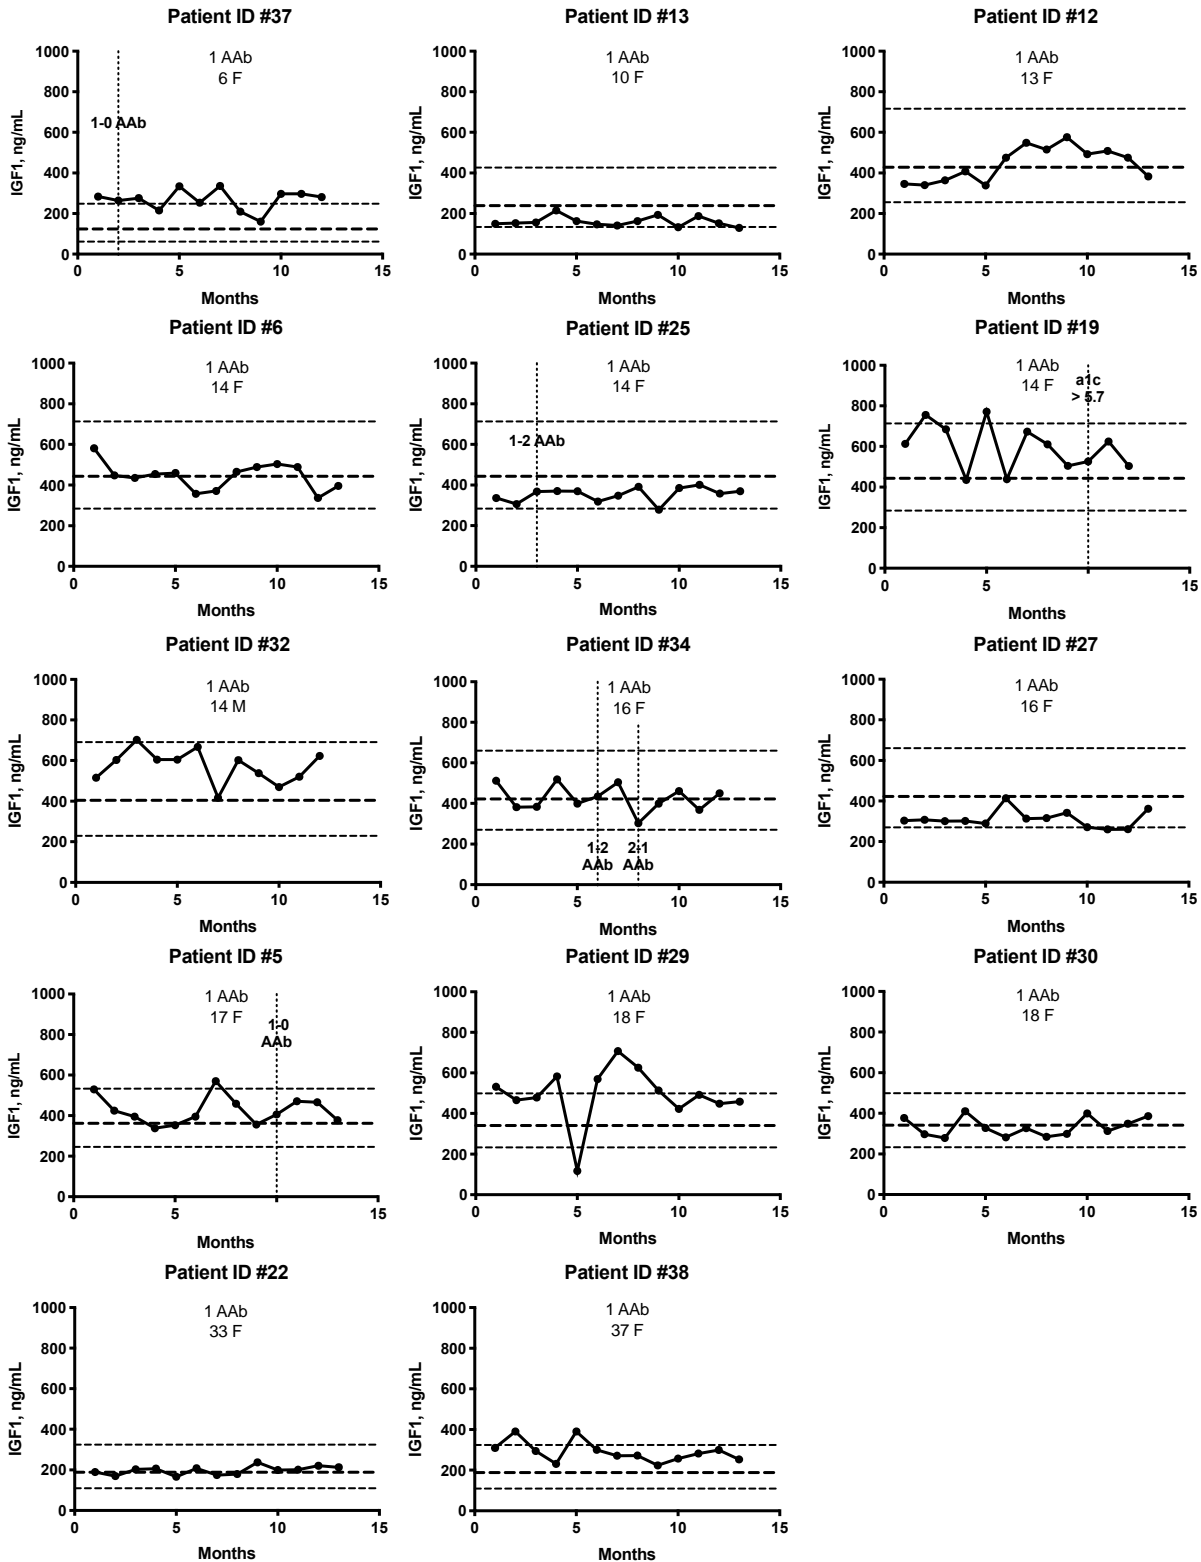

## SUPPLEMENTARY DATA

**Supplementary Figure 5. Longitudinal follow-up of subjects with a single AAb at enrollment shows IGF2 stability over time.** Subjects from longitudinal T1DBIT cohort. Raw IGF2 levels of individual T1DBIT subjects shown as solid lines. Subjects arranged in order of increasing age. 5%, 50%, and 95% reference ranges for age and sex are shown per person as horizontal dashed lines. Time of pre-type 1 diabetes (a1c > 5.7) or seroconversion events shown with vertical dashed black lines. Spearman r and p values shown in upper right-hand corner.

SUPPLEMENTARY DATA

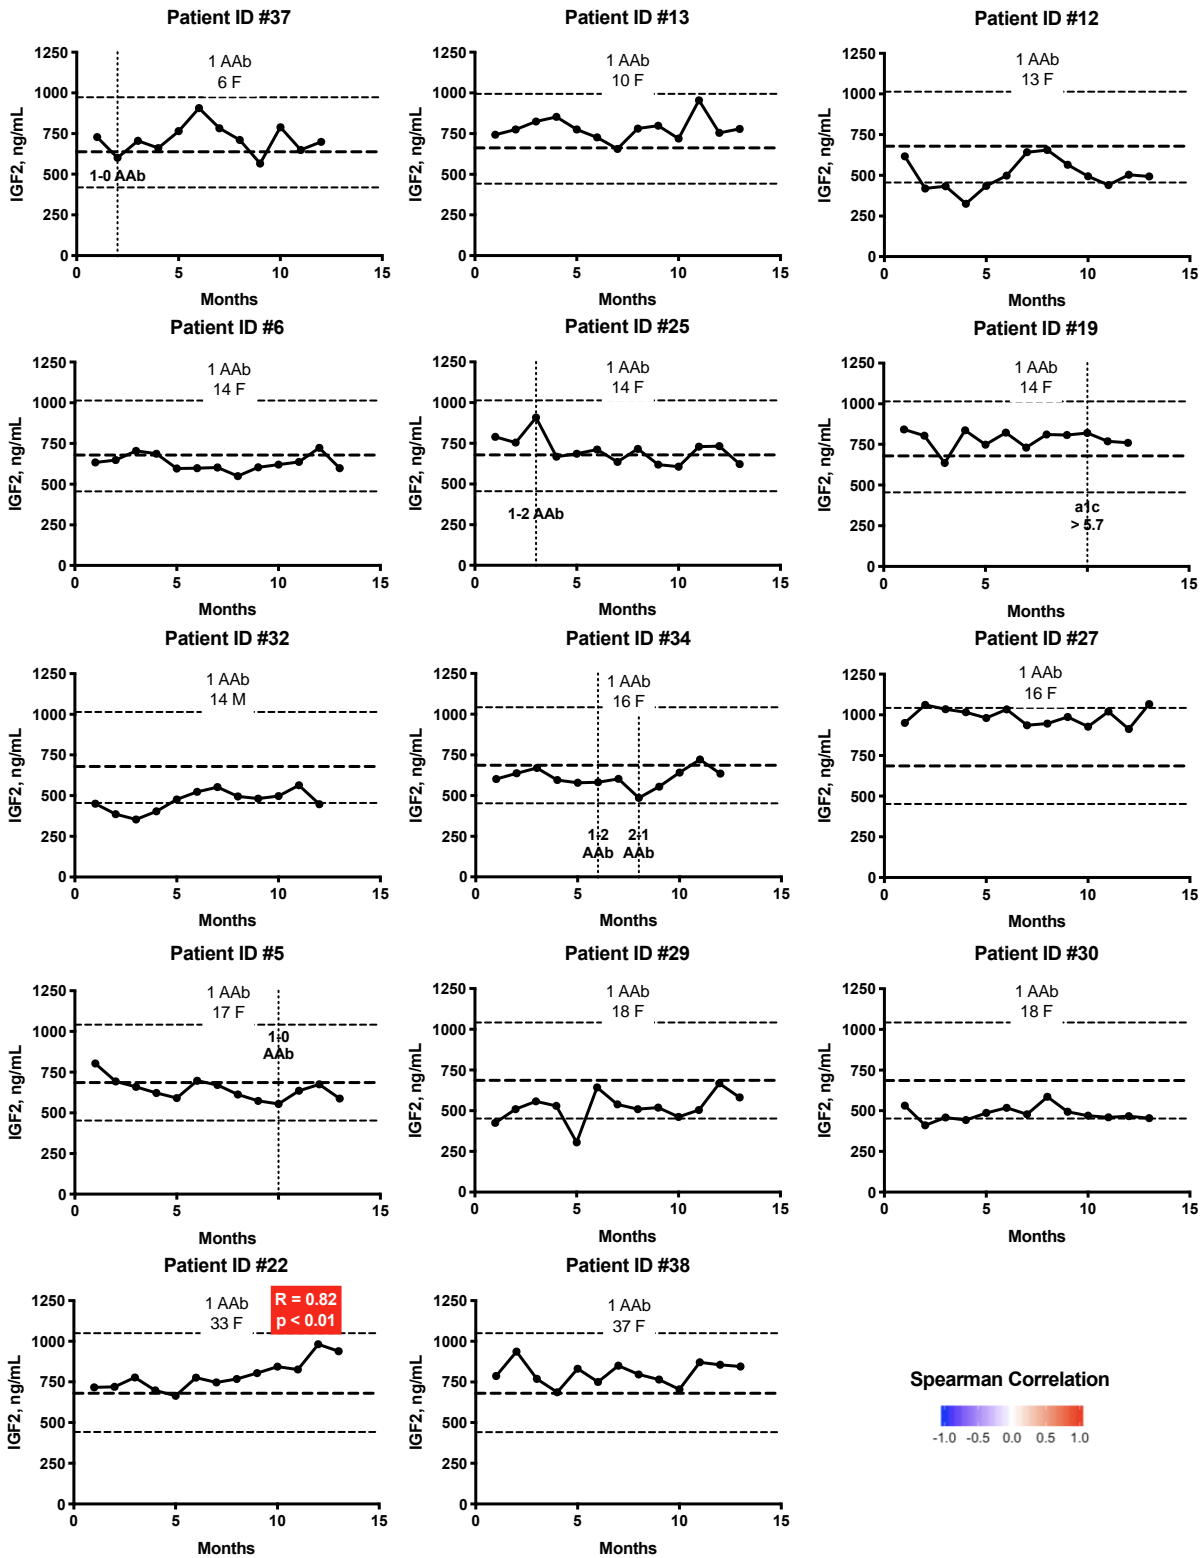

## SUPPLEMENTARY DATA

**Supplementary Figure 6. Longitudinal follow-up of subjects with multiple AAb at enrollment shows IGF1 typically stable or decreasing over time.** Subjects from longitudinal T1DBIT cohort. Raw IGF1 levels of individual T1DBIT subjects shown as solid lines. Subjects arranged in order of number of AAb at enrollment, followed by increasing age. 5%, 50%, and 95% reference ranges for age and sex are shown per person as horizontal dashed lines. Time of pre-type 1 diabetes ( $a1c > 5.7$ ) or seroconversion events shown with vertical dashed black lines. Spearman  $r$  and  $p$  values shown in upper right-hand corner.

SUPPLEMENTARY DATA

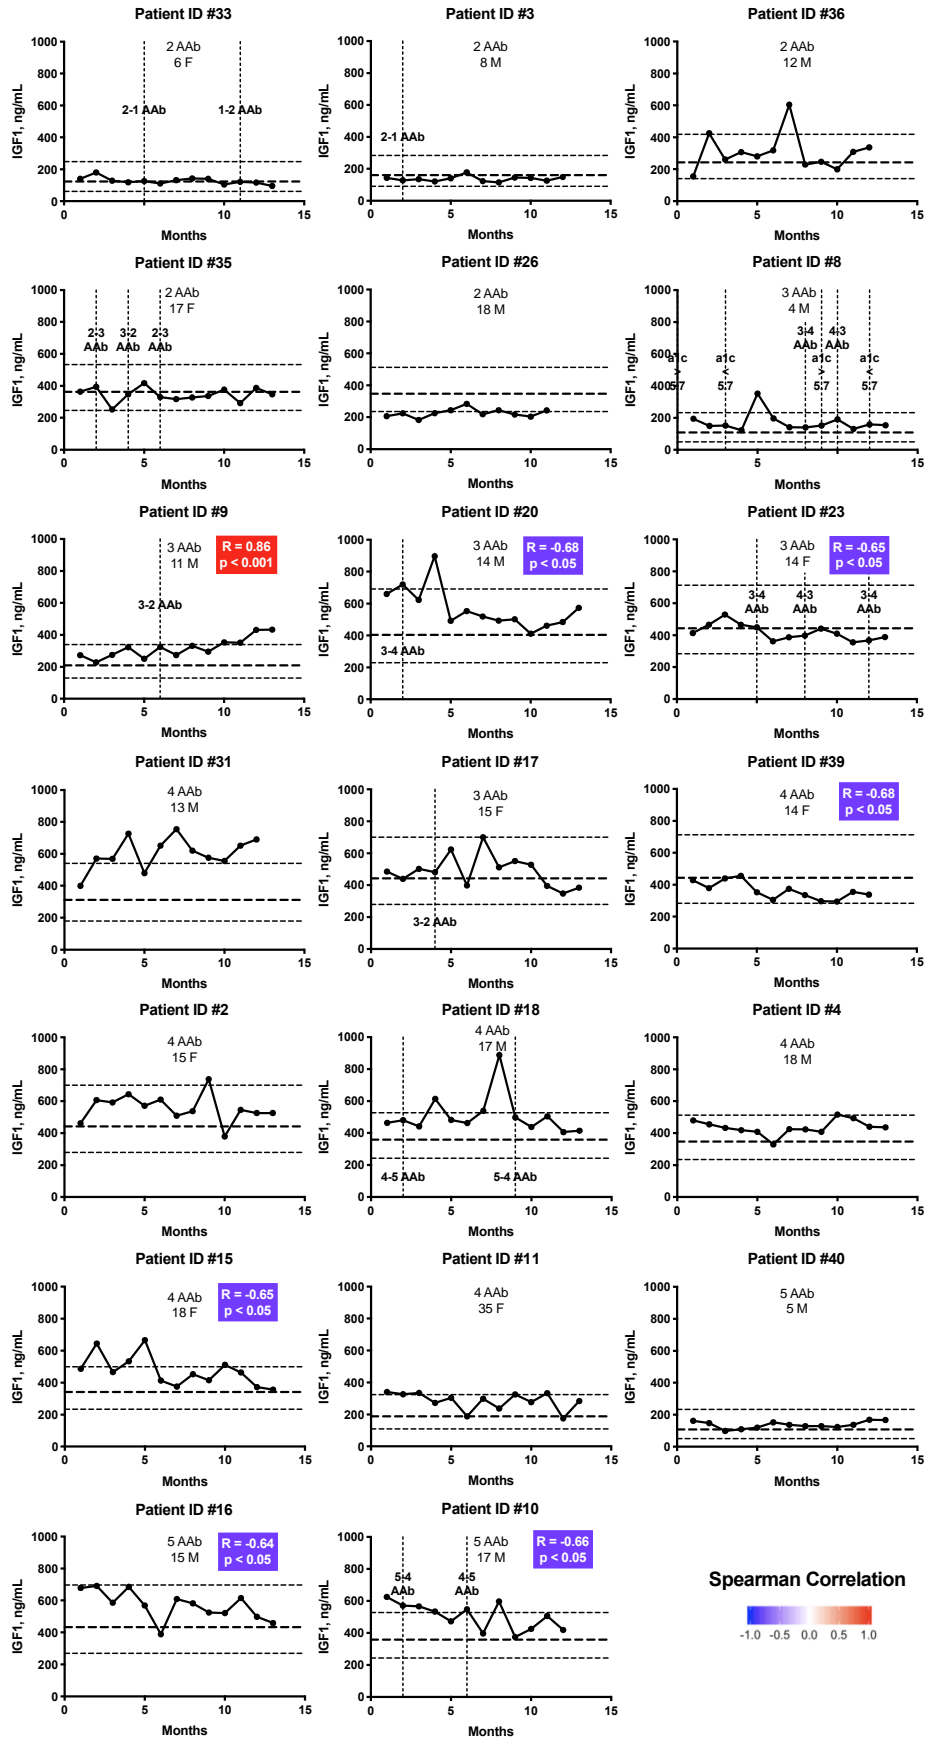

## SUPPLEMENTARY DATA

**Supplementary Figure 7. Longitudinal follow-up of subjects with multiple AAb at enrollment shows IGF2 typically stable or increasing over time.** Subjects from longitudinal T1DBIT cohort. Raw IGF2 levels of individual T1DBIT subjects shown as solid lines. Subjects arranged in order of number of AAb at enrollment, followed by increasing age. 5%, 50%, and 95% reference ranges for age and sex are shown per person as horizontal dashed lines. Time of pre-type 1 diabetes (a1c > 5.7) or seroconversion events shown with vertical dashed black lines. Spearman r and p values shown in upper right-hand corner.

SUPPLEMENTARY DATA

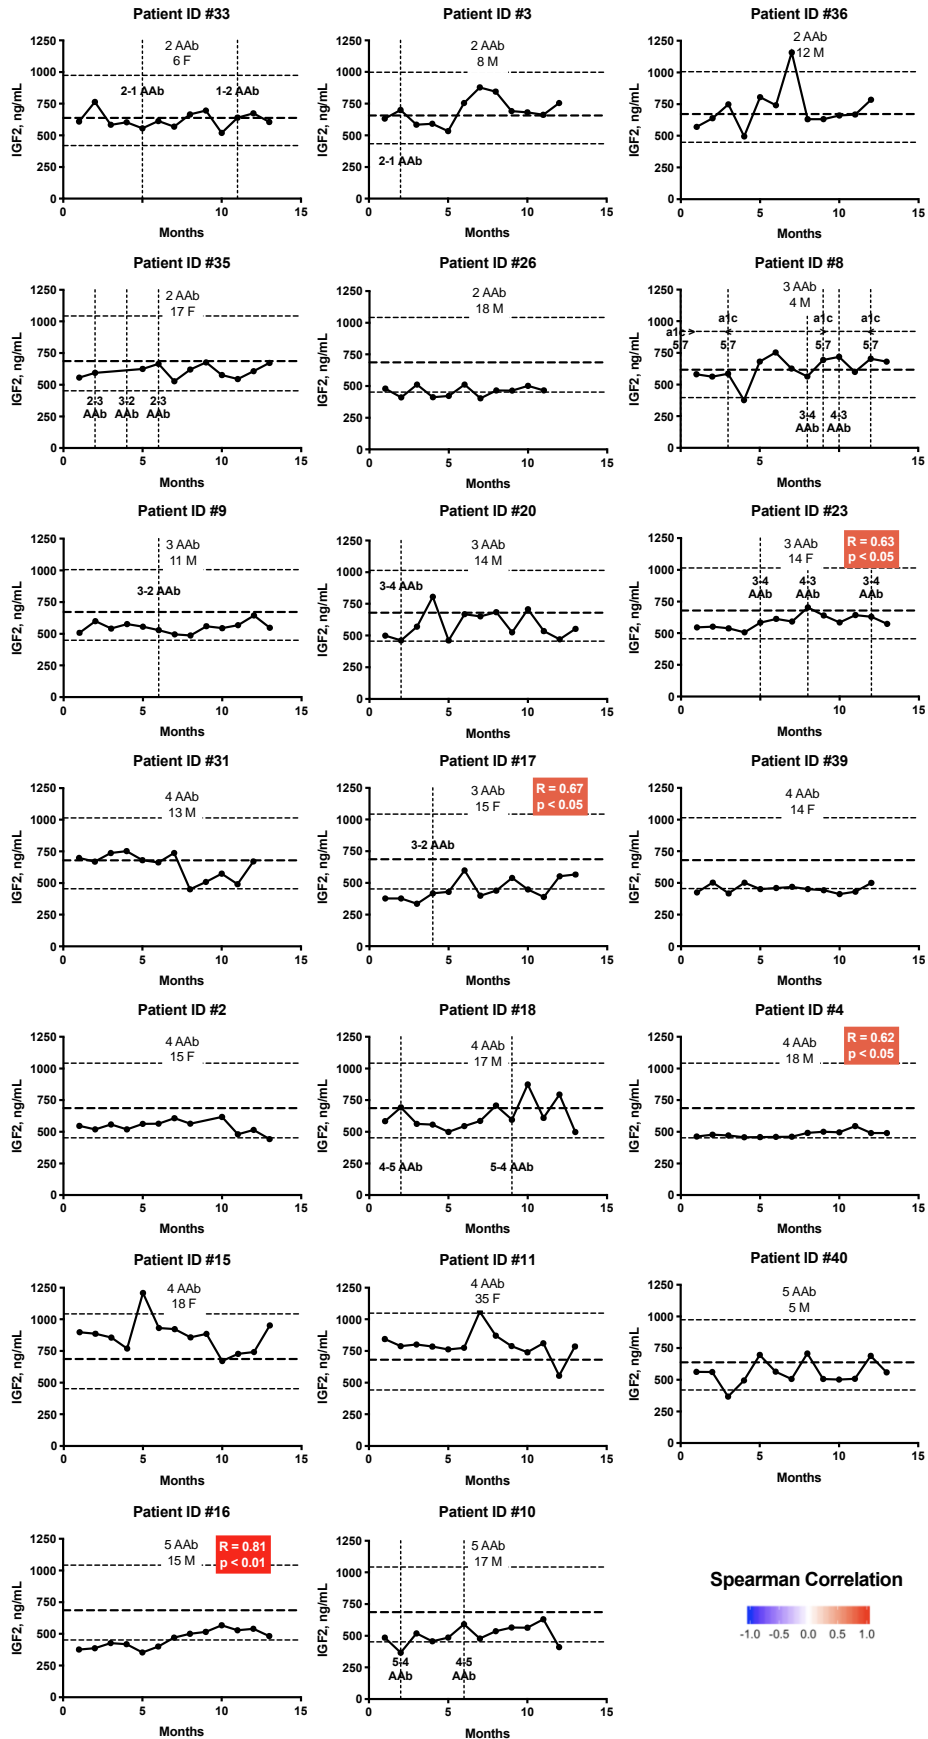



SUPPLEMENTARY DATA

**Supplementary Figure 8. Longitudinal follow-up of multiple AAb subjects who develop type 1 diabetes during study shows IGF1 decreasing over time.** Subjects from longitudinal T1DBIT cohort. Raw IGF1 levels of individual T1DBIT subjects shown as solid lines. Subjects arranged from those diagnosed earlier to later in the study. 5%, 50%, and 95% reference ranges for age and sex are shown per person as horizontal dashed lines. Time of diagnosis shown as vertical red line (a1c > 6.4) and pre-type 1 diabetes (a1c > 5.7) or seroconversion events shown with vertical dashed black lines. Spearman r and p values shown in upper right-hand corner.

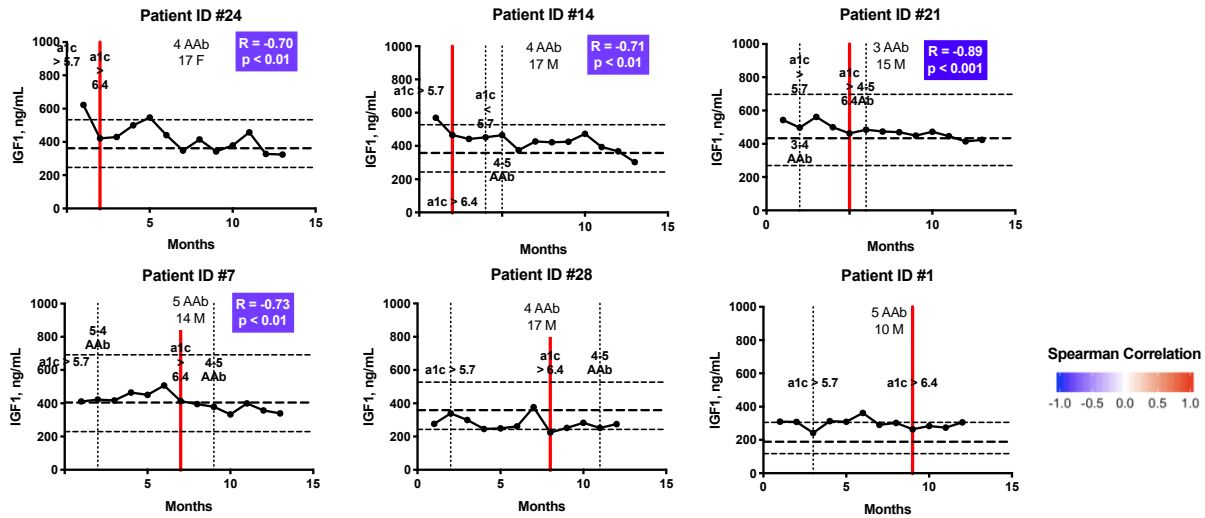

SUPPLEMENTARY DATA

**Supplementary Figure 9. Longitudinal follow-up of multiple AAb subjects who develop type 1 diabetes during study shows variable trajectory of IGF2 over time.** Subjects from longitudinal T1DBIT cohort. Raw IGF2 levels of individual T1DBIT subjects shown as solid lines. Subjects arranged from those diagnosed earlier to later in the study. 5%, 50%, and 95% reference ranges for age and sex are shown per person as horizontal dashed lines. Time of diagnosis shown as vertical red line (a1c > 6.4) and pre-type 1 diabetes (a1c > 5.7) or seroconversion events shown with vertical dashed black lines. Spearman r and p values shown in upper right-hand corner.

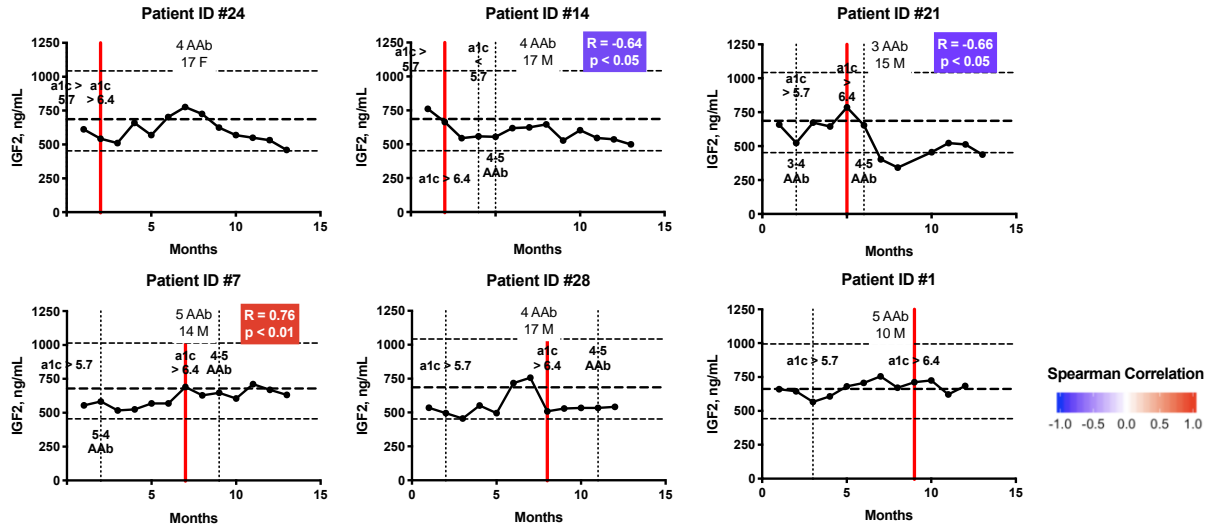

Supplement: DB190942SupplementaryData.pdf [file DB190942SupplementaryData.pdf]
